# Supplementary material
Source: MDPI journal article supplement (https://www.mdpi.com/2073-4441/13/7/992)
Supplement: s1 [file s1]

### Supplementary Materials:

Table S1: Descriptive statistics of the chlorine decay constants (k) in ultrapure water sample (control) and water from wells located in Porto Velho.

|                | Mean    | Median  | Max.    | Min.    | n  | SD    |
|----------------|---------|---------|---------|---------|----|-------|
| <b>Control</b> | 0.01064 | 0.00779 | 0.03199 | 0.00205 | 30 | 0.007 |
| <b>Test</b>    | 0.04103 | 0.02073 | 0.17992 | 0.00377 | 30 | 0.050 |

SD: standard deviation; Max.: maximum; Min.: minimum.

Table S2: Descriptive statistics of the chlorine decay constants (k) in water samples from tubular and excavated wells located in Porto Velho.

| Wells            | n  | Mean   | Median | Max.   | Min.   | SD     |
|------------------|----|--------|--------|--------|--------|--------|
| <b>Tubular</b>   | 15 | 0.0171 | 0.0083 | 0.0551 | 0.0038 | 0.0162 |
| <b>Excavated</b> | 15 | 0.0650 | 0.0282 | 0.1799 | 0.0091 | 0.0610 |

SD: standard deviation; Max.: maximum; Min.: minimum.

Table S3: Results of the analysis of variance of data on chlorine decay speed in water samples from tubular and excavated wells located in Porto Velho.

| Test                  | Source        | DF | SS     | MS     | F-value | p-value     |
|-----------------------|---------------|----|--------|--------|---------|-------------|
| <b>Two-way ANOVA</b>  | Type          | 1  | 11.851 | 11.851 | 52.5    | 0.0000001   |
|                       | Concentration | 2  | 20.983 | 10.492 | 46.48   | 0.000000002 |
|                       | Residual      | 26 | 5.869  | 0.226  |         |             |
| Test                  | Source        | DF | SS     | QM     | F-value | p-value     |
| <b>Excavated Well</b> | Intercept     | 1  | 0.0632 | 0.002  | 107.5   | 0.000       |
|                       | Concentration | 2  | 0.0463 | 0.003  | 52.554  | 0.000       |
| Test                  | Source        | DF | SS     | QM     | F-value | p-value     |
| <b>Tubular Well</b>   | Intercept     | 1  | 0.004  | 0.0006 | 27.006  | 0.0065      |
|                       | Concentration | 2  | 0.002  | 0.0003 | 33.284  | 0.0001      |

DF: degrees of freedom; SS: sum of squares; MS: medium squares.
